# Supplementary material for: Characterization of a Lytic Bacteriophage against Pseudomonas syringae pv. actinidiae and Its Endolysin
Source: MDPI journal article supplement (doi:10.3390/v13040631), 2021-04-07
Supplement: s1 [file s1]

# SUPPLEMENTAL MATERIAL

**Table S1. Genomic annotation of phage PN09**

| Predicted genes | Start | Stop | Strand | Length (aa) | Putative function/feature | Best matched evidence or organism | Homolog Accession Number | Query Coverage | % Id   | BlastP E-Value |
|-----------------|-------|------|--------|-------------|---------------------------|-----------------------------------|--------------------------|----------------|--------|----------------|
| 1               | 688   | 245  | -      | 147         | hypothetical protein      | Pseudomonas phage phiPsa397       | QNO00778.1               | 100%           | 86.39% | 4.00E-92       |
| 2               | 951   | 685  | -      | 88          | hypothetical protein      | Pseudomonas phage phiPsa267       | QNN99974.1               | 95%            | 57.14% | 4.00E-23       |
| 3               | 1344  | 1063 | -      | 93          | hypothetical protein      | Vibrio phage VH1_2019             | QHJ74374.1               | 69%            | 43.08% | 8.00E-09       |
| 4               | 1538  | 1341 | -      | 65          | hypothetical protein      | Pseudomonas phage phiPsa374       | YP_009009301.1           | 100%           | 96.92% | 2.00E-36       |

---

|    |      |      |   |     |                                |                                |                |      |        |           |
|----|------|------|---|-----|--------------------------------|--------------------------------|----------------|------|--------|-----------|
| 5  | 1921 | 1535 | - | 128 | hypothetical protein           | Pseudomonas<br>phage phiPsa315 | QNO00279.1     | 100% | 95.31% | 1.00E-85  |
| 6  | 2043 | 1918 | - | 41  | hypothetical protein           | Pseudomonas<br>phage phiPsa315 | QNO00373.1     | 97%  | 72.50% | 4.00E-13  |
| 7  | 2489 | 2043 | - | 148 | peptide chain release factor 1 | Pseudomonas<br>phage phiPsa315 | QNO00263.1     | 99%  | 97.28% | 4.00E-102 |
| 8  | 2920 | 2489 | - | 143 | hypothetical protein           | Pseudomonas<br>phage phiPsa300 | QNO00093.1     | 99%  | 68.53% | 3.00E-71  |
| 9  | 2995 | 3243 | + | 82  | hypothetical protein           | None                           | n/a            | n/a  | n/a    | n/a       |
| 10 | 3605 | 3363 | - | 80  | hypothetical protein           | Pseudomonas<br>phage phiPsa374 | YP_009009306.1 | 100% | 77.50% | 3.00E-34  |

---

---

|    |      |      |   |     |                              |                                |                |      |        |           |
|----|------|------|---|-----|------------------------------|--------------------------------|----------------|------|--------|-----------|
| 11 | 4163 | 3771 | - | 130 | hypothetical protein         | Pseudomonas<br>phage phiPsa315 | QNO00276.1     | 100% | 96.92% | 1.00E-84  |
| 12 | 4568 | 4224 | - | 114 | hypothetical protein         | Pseudomonas<br>phage phiPsa315 | QNO00291.1     | 100% | 99.12% | 9.00E-77  |
| 13 | 5224 | 4628 | - | 198 | tellurium resistance protein | Pseudomonas<br>phage phiPsa315 | QNO00240.1     | 100% | 98.48% | 3.00E-144 |
| 14 | 5961 | 5290 | - | 223 | membrane protein             | Pseudomonas<br>phage phiPsa374 | YP_009009310.1 | 100% | 97.76% | 2.00E-147 |
| 15 | 6689 | 6039 | - | 216 | hypothetical protein         | Pseudomonas<br>phage phiPsa315 | QNO00239.1     | 99%  | 99.07% | 8.00E-155 |

---

---

|    |      |      |   |     |                              |                                |                |      |        |           |
|----|------|------|---|-----|------------------------------|--------------------------------|----------------|------|--------|-----------|
| 16 | 6959 | 6705 | - | 84  | hypothetical protein         | Pseudomonas<br>phage phiPsa374 | YP_009009312.1 | 100% | 96.43% | 2.00E-54  |
| 17 | 8102 | 6984 | - | 372 | tellurite resistance protein | Pseudomonas<br>phage phiPsa315 | QNO00218.1     | 100% | 99.19% | 0         |
| 18 | 8493 | 8107 | - | 128 | hypothetical protein         | Pseudomonas<br>phage phiPsa315 | QNO00280.1     | 100% | 98.44% | 5.00E-89  |
| 19 | 8998 | 8495 | - | 167 | hypothetical protein         | Pseudomonas<br>phage phiPsa374 | YP_009009315.1 | 100% | 88.02% | 4.00E-107 |
| 20 | 9315 | 8995 | - | 106 | hypothetical protein         | Pseudomonas<br>phage phiPsa315 | QNO00300.1     | 100% | 99.06% | 2.00E-72  |

---

|    |       |       |   |     |                      |                                |            |      |        |           |
|----|-------|-------|---|-----|----------------------|--------------------------------|------------|------|--------|-----------|
| 21 | 9515  | 9312  | - | 67  | hypothetical protein | Pseudomonas<br>phage phiPsa300 | QNO00171.1 | 100% | 95.52% | 2.00E-39  |
| 22 | 9739  | 9524  | - | 71  | hypothetical protein | Pseudomonas<br>phage phiPsa315 | QNO00334.1 | 100% | 98.59% | 4.00E-43  |
| 23 | 10317 | 9739  | - | 192 | hypothetical protein | Pseudomonas<br>phage PPSC2     | ATN92901.1 | 100% | 84.38% | 4.00E-118 |
| 24 | 10625 | 10317 | - | 102 | hypothetical protein | Pseudomonas<br>phage phiPsa315 | QNO00305.1 | 100% | 98.04% | 8.00E-68  |
| 25 | 10780 | 10625 | - | 51  | hypothetical protein | Pseudomonas<br>phage phiK7A1   | QNR53807.1 | 96%  | 98.00% | 6.00E-26  |
| 26 | 10869 | 10780 | - | 29  | hypothetical protein | None                           | n/a        | n/a  | n/a    | n/a       |

---

|    |       |       |   |     |                                                            |                                |            |      |        |           |
|----|-------|-------|---|-----|------------------------------------------------------------|--------------------------------|------------|------|--------|-----------|
| 27 | 11360 | 10863 | - | 165 | hypothetical protein                                       | Pseudomonas<br>phage phiPsa315 | QNO00255.1 | 96%  | 95.65% | 2.00E-110 |
| 28 | 11590 | 11357 | - | 77  | hypothetical protein                                       | None                           | n/a        | n/a  | n/a    | n/a       |
| 29 | 13429 | 11639 | - | 596 | Nicotinamide<br>phosphoribosyltransferase (EC<br>2.4.2.12) | Pseudomonas<br>phage phiPsa315 | QNO00208.1 | 100% | 96.98% | 0         |
| 30 | 14297 | 13497 | - | 266 | hypothetical protein                                       | Pseudomonas<br>phage phiPsa267 | QNN99887.1 | 100% | 73.51% | 4.00E-92  |
| 31 | 14749 | 14312 | - | 145 | hypothetical protein                                       | Pseudomonas<br>phage phiPsa347 | QNO00441.1 | 100% | 68.79% | 3.00E-12  |

---

---

|    |       |       |   |     |                                       |                                |                |      |        |           |
|----|-------|-------|---|-----|---------------------------------------|--------------------------------|----------------|------|--------|-----------|
| 32 | 15652 | 14759 | - | 297 | ribose-phosphate<br>pyrophosphokinase | Pseudomonas<br>phage phiPsa397 | QNO00748.1     | 100% | 85.28% | 0         |
| 33 | 16113 | 15718 | - | 131 | hypothetical protein                  | Pseudomonas<br>phage VCM       | YP_009222739.1 | 100% | 78.63% | 2.00E-71  |
| 34 | 16656 | 16243 | - | 137 | hypothetical protein                  | Pseudomonas<br>phage phiPsa374 | YP_009009330.1 | 99%  | 86.03% | 3.00E-76  |
| 35 | 17582 | 16656 | - | 308 | RNA ligase                            | Pseudomonas<br>phage phiPsa300 | QNO00057.1     | 100% | 81.50% | 0.00E+00  |
| 36 | 17805 | 17584 | - | 73  | hypothetical protein                  | Pseudomonas<br>phage PPSC2     | ATN92911.1     | 100% | 75.68% | 1.00E-31  |
| 37 | 18374 | 17805 | - | 189 | hypothetical protein                  | Pseudomonas<br>phage phiPsa374 | YP_009009333.1 | 100% | 98.94% | 5.00E-137 |

---

|    |       |       |   |     |                                                                       |                             |                |      |        |          |
|----|-------|-------|---|-----|-----------------------------------------------------------------------|-----------------------------|----------------|------|--------|----------|
| 38 | 18552 | 18367 | - | 61  | hypothetical protein                                                  | Pseudomonas fluorescens     | WP_152988010.1 | 100% | 75.41% | 9.00E-25 |
| 39 | 19019 | 18540 | - | 159 | Guanosine-3',5'-bis(diphosphate) 3'-pyrophosphohydrolase (EC 3.1.7.2) | Pseudomonas phage phiPsa374 | YP_009009334.1 | 98%  | 86.54% | 3.00E-96 |
| 40 | 19571 | 19077 | - | 164 | hypothetical protein                                                  | Pseudomonas phage phiPsa267 | QNN99911.1     | 100% | 84.15% | 2.00E-97 |



---

|    |       |       |   |     |                      |                                |                |      |        |          |
|----|-------|-------|---|-----|----------------------|--------------------------------|----------------|------|--------|----------|
| 41 | 20751 | 19582 | - | 389 | DNA ligase           | Pseudomonas<br>phage phiPsa267 | QNN99869.1     | 100% | 87.92% | 0.00E+00 |
| 42 | 21068 | 20748 | - | 106 | hypothetical protein | Pseudomonas<br>phage phiPsa267 | QNN99956.1     | 100% | 76.42% | 5.00E-56 |
| 43 | 21301 | 21068 | - | 77  | hypothetical protein | Pseudomonas<br>phage phiPsa374 | YP_009009339.1 | 100% | 98.70% | 8.00E-50 |
| 44 | 21692 | 21288 | - | 134 | hypothetical protein | Pseudomonas<br>phage phiPsa374 | YP_009009340.1 | 100% | 88.06% | 4.00E-84 |
| 45 | 21858 | 21682 | - | 58  | hypothetical protein | Pseudomonas<br>phage VCM       | YP_009222728.1 | 77%  | 64.58% | 4.00E-14 |
| 46 | 22064 | 21858 | - | 68  | hypothetical protein | Pseudomonas<br>phage phiPsa267 | QNN99995.1     | 100% | 85.29% | 2.00E-34 |

---

|    |       |       |   |     |                      |                                |                |      |        |           |
|----|-------|-------|---|-----|----------------------|--------------------------------|----------------|------|--------|-----------|
| 47 | 22405 | 22061 | - | 114 | hypothetical protein | Pseudomonas<br>phage phiPsa374 | YP_009009343.1 | 100% | 90.35% | 2.00E-73  |
| 48 | 23090 | 22479 | - | 203 | hypothetical protein | Pseudomonas<br>phage phiPsa374 | YP_009009344.1 | 100% | 99.01% | 3.00E-147 |
| 49 | 23844 | 23083 | - | 253 | hypothetical protein | Pseudomonas<br>phage phiPsa374 | YP_009009345.1 | 100% | 98.81% | 0.00E+00  |
| 50 | 24229 | 23885 | - | 114 | hypothetical protein | Pseudomonas<br>phage phiPsa374 | YP_009009346.1 | 100% | 99.12% | 3.00E-76  |
| 51 | 24669 | 24229 | - | 146 | hypothetical protein | Pseudomonas<br>phage phiPsa300 | QNO00096.1     | 100% | 93.15% | 3.00E-86  |
| 52 | 25400 | 25110 | - | 96  | hypothetical protein | None                           | n/a            | n/a  | n/a    | n/a       |

---

|    |       |       |   |     |                      |                                |                |      |         |          |
|----|-------|-------|---|-----|----------------------|--------------------------------|----------------|------|---------|----------|
| 53 | 25519 | 25839 | + | 106 | hypothetical protein | Pseudomonas<br>phage phiPsa374 | YP_009009348.1 | 100% | 97.17%  | 2.00E-68 |
| 54 | 26934 | 27323 | + | 129 | hypothetical protein | Pseudomonas<br>phage phiPsa315 | QNO00247.1     | 99%  | 92.97%  | 2.00E-81 |
| 55 | 27666 | 27794 | + | 42  | hypothetical protein | Pseudomonas<br>phage phiPsa374 | YP_009009350.1 | 100% | 100.00% | 8.00E-22 |
| 56 | 27883 | 28002 | + | 39  | hypothetical protein | None                           | n/a            | n/a  | n/a     | n/a      |
| 57 | 28850 | 29002 | + | 50  | hypothetical protein | Pseudomonas<br>phage phiPsa397 | QNO00881.1     | 100% | 94.00%  | 4.00E-26 |
| 58 | 29721 | 30998 | + | 425 | hypothetical protein | Pseudomonas<br>phage phiPsa315 | QNO00215.1     | 100% | 98.59%  | 0.00E+00 |

---

---

|    |       |       |   |     |                         |                                |                |      |         |           |
|----|-------|-------|---|-----|-------------------------|--------------------------------|----------------|------|---------|-----------|
| 59 | 31014 | 31277 | + | 87  | hypothetical protein    | Pseudomonas<br>phage phiPsa374 | YP_009009353.1 | 100% | 88.51%  | 2.00E-48  |
| 60 | 31277 | 33091 | + | 604 | tail fiber protein      | Pseudomonas<br>phage phiPsa374 | YP_009009354.1 | 100% | 85.60%  | 0         |
| 61 | 33107 | 33328 | + | 73  | hypothetical protein    | Pseudomonas<br>fluorescens     | WP_152988007.1 | 97%  | 67.61%  | 4.00E-22  |
| 62 | 33481 | 34950 | + | 489 | terminase large subunit | Pseudomonas<br>phage phiPsa300 | QNO00040.1     | 100% | 98.77%  | 0.00E+00  |
| 63 | 34962 | 36419 | + | 485 | hypothetical protein    | Pseudomonas<br>phage phiPsa267 | QNN99864.1     | 100% | 99.59%  | 0.00E+00  |
| 64 | 36429 | 36884 | + | 151 | hypothetical protein    | Pseudomonas<br>phage phiPsa374 | YP_009009358.1 | 100% | 100.00% | 3.00E-106 |

---

---

|    |       |       |   |     |                      |                                |                |      |         |           |
|----|-------|-------|---|-----|----------------------|--------------------------------|----------------|------|---------|-----------|
| 65 | 36881 | 37801 | + | 306 | hypothetical protein | Pseudomonas<br>phage phiPsa374 | YP_009009359.1 | 100% | 96.73%  | 0.00E+00  |
| 66 | 37828 | 38214 | + | 128 | hypothetical protein | Pseudomonas<br>phage phiPsa374 | YP_009009360.1 | 100% | 96.88%  | 7.00E-82  |
| 67 | 38227 | 39288 | + | 353 | hypothetical protein | Pseudomonas<br>phage phiPsa374 | YP_009009361.1 | 100% | 98.87%  | 0.00E+00  |
| 68 | 39339 | 39818 | + | 159 | hypothetical protein | Pseudomonas<br>phage phiPsa374 | YP_009009362.1 | 100% | 100.00% | 6.00E-115 |
| 69 | 39802 | 40269 | + | 155 | hypothetical protein | Pseudomonas<br>phage phiPsa315 | QNO00261.1     | 100% | 99.35%  | 3.00E-110 |

---

---

|    |       |       |   |     |                      |                                |                |      |         |           |
|----|-------|-------|---|-----|----------------------|--------------------------------|----------------|------|---------|-----------|
| 70 | 40281 | 40649 | + | 122 | hypothetical protein | Pseudomonas<br>phage phiPsa374 | YP_009009364.1 | 100% | 100.00% | 4.00E-85  |
| 71 | 40646 | 41215 | + | 189 | hypothetical protein | Pseudomonas<br>phage phiPsa374 | YP_009009365.1 | 100% | 97.35%  | 2.00E-133 |
| 72 | 41227 | 42510 | + | 427 | hypothetical protein | Pseudomonas<br>phage phiPsa347 | QNO00386.1     | 100% | 96.02%  | 0.00E+00  |
| 73 | 42545 | 43069 | + | 174 | hypothetical protein | Pseudomonas<br>phage phiPsa374 | YP_009009367.1 | 100% | 98.28%  | 2.00E-121 |
| 74 | 43134 | 43637 | + | 167 | hypothetical protein | Pseudomonas<br>phage phiPsa374 | YP_009009368.1 | 100% | 98.20%  | 1.00E-115 |

---

---

|    |       |       |   |     |                      |                                |                |      |        |           |
|----|-------|-------|---|-----|----------------------|--------------------------------|----------------|------|--------|-----------|
| 75 | 43647 | 44183 | + | 178 | hypothetical protein | Pseudomonas<br>phage phiPsa374 | YP_009009369.1 | 100% | 97.19% | 7.00E-123 |
| 76 | 44205 | 44567 | + | 120 | hypothetical protein | Pseudomonas<br>phage phiPsa374 | YP_009009370.1 | 99%  | 94.12% | 6.00E-72  |
| 77 | 44588 | 44812 | + | 74  | hypothetical protein | Pseudomonas<br>phage phiPsa374 | YP_009009371.1 | 100% | 86.49% | 5.00E-36  |
| 78 | 44826 | 47183 | + | 785 | hypothetical protein | Pseudomonas<br>phage phiPsa381 | QNO00550.1     | 100% | 69.63% | 0.00E+00  |
| 79 | 47183 | 47971 | + | 262 | hypothetical protein | Pseudomonas<br>phage phiPsa300 | QNO00059.1     | 98%  | 89.19% | 2.00E-169 |

---

---

|    |       |       |   |     |                      |                                |                |      |        |           |
|----|-------|-------|---|-----|----------------------|--------------------------------|----------------|------|--------|-----------|
| 80 | 47981 | 48322 | + | 113 | hypothetical protein | Pseudomonas<br>phage phiPsa315 | QNO00294.1     | 100% | 92.92% | 2.00E-74  |
| 81 | 48326 | 49246 | + | 306 | hypothetical protein | Pseudomonas<br>phage phiPsa374 | YP_009009375.1 | 100% | 98.37% | 0.00E+00  |
| 82 | 49243 | 50007 | + | 254 | hypothetical protein | Pseudomonas<br>phage phiPsa315 | QNO00233.1     | 99%  | 93.68% | 9.00E-175 |
| 83 | 50009 | 50374 | + | 121 | hypothetical protein | Pseudomonas<br>phage phiPsa374 | YP_009009377.1 | 100% | 94.21% | 9.00E-78  |
| 84 | 50378 | 51835 | + | 485 | hypothetical protein | Pseudomonas<br>phage phiPsa315 | QNO00213.1     | 100% | 98.76% | 0.00E+00  |

---



---

|    |       |       |   |     |                          |                                |                |      |        |           |
|----|-------|-------|---|-----|--------------------------|--------------------------------|----------------|------|--------|-----------|
| 85 | 51847 | 52581 | + | 244 | hypothetical protein     | Pseudomonas<br>phage phiPsa267 | QNN99886.1     | 100% | 99.18% | 3.00E-174 |
| 86 | 52592 | 55060 | + | 822 | hypothetical protein     | Pseudomonas<br>phage phiPsa315 | QNO00203.1     | 95%  | 71.21% | 0.00E+00  |
| 87 | 55108 | 55476 | + | 122 | hypothetical protein     | Pseudomonas<br>phage phiPsa374 | YP_009009381.1 | 100% | 98.36% | 4.00E-82  |
| 88 | 55495 | 56970 | + | 491 | tail fiber protein       | Pseudomonas<br>phage phiPsa267 | QNN99862.1     | 100% | 91.45% | 0.00E+00  |
| 89 | 56972 | 57529 | + | 185 | putative phage endolysin | Pseudomonas<br>phage phiPsa315 | QNO00248.1     | 100% | 97.84% | 5.00E-133 |

---

|    |       |       |   |     |                      |                                      |                |      |         |          |
|----|-------|-------|---|-----|----------------------|--------------------------------------|----------------|------|---------|----------|
| 90 | 57545 | 57748 | + | 67  | hypothetical protein | Pseudomonas<br>phage<br>vB_PsyM_KIL3 | AMR57649.1     | 88%  | 53.03%  | 2.00E-15 |
| 91 | 57732 | 58154 | + | 140 | hypothetical protein | Pseudomonas<br>phage phiPsa315       | QNO00269.1     | 100% | 97.14%  | 1.00E-95 |
| 92 | 58304 | 58603 | + | 99  | hypothetical protein | Pseudomonas<br>phage phiPsa374       | YP_009009387.1 | 100% | 100.00% | 3.00E-64 |
| 93 | 58619 | 58945 | + | 108 | hypothetical protein | Pseudomonas<br>phage phiPsa267       | QNN99953.1     | 100% | 96.30%  | 1.00E-69 |
| 94 | 59160 | 58972 | - | 62  | hypothetical protein | Pseudomonas<br>phage phiPsa374       | YP_009009389.1 | 100% | 90.32%  | 2.00E-33 |
| 95 | 59296 | 59153 | - | 47  | hypothetical protein | Pseudomonas<br>phage phiPsa374       | YP_009009390.1 | 100% | 100.00% | 2.00E-25 |

---

|     |       |       |   |     |                      |                                |                |      |        |           |
|-----|-------|-------|---|-----|----------------------|--------------------------------|----------------|------|--------|-----------|
| 96  | 59696 | 59307 | - | 129 | hypothetical protein | Pseudomonas<br>phage phiPsa374 | YP_009009392.1 | 99%  | 88.37% | 4.00E-80  |
| 97  | 60105 | 60416 | + | 103 | hypothetical protein | Pseudomonas<br>phage phiPsa300 | QNO00135.1     | 99%  | 77.45% | 1.00E-53  |
| 98  | 60413 | 61042 | + | 209 | hypothetical protein | Pseudomonas<br>phage phiPsa381 | QNO00586.1     | 100% | 94.26% | 2.00E-146 |
| 99  | 61039 | 61326 | + | 95  | hypothetical protein | Pseudomonas<br>phage phiPsa315 | QNO00308.1     | 100% | 91.58% | 8.00E-59  |
| 100 | 61456 | 61650 | + | 64  | hypothetical protein | Pseudomonas<br>phage phiPsa374 | YP_009009398.1 | 100% | 85.94% | 5.00E-34  |

---

---

|     |       |       |   |     |                      |                                |                |      |        |           |
|-----|-------|-------|---|-----|----------------------|--------------------------------|----------------|------|--------|-----------|
| 101 | 61647 | 61967 | + | 106 | hypothetical protein | Pseudomonas<br>phage phiPsa315 | QNO00303.1     | 99%  | 99.05% | 7.00E-73  |
| 102 | 62033 | 62650 | + | 205 | hypothetical protein | Pseudomonas<br>phage phiPsa374 | YP_009009400.1 | 99%  | 95.12% | 4.00E-136 |
| 103 | 63080 | 63433 | + | 117 | hypothetical protein | Pseudomonas<br>phage PPSC2     | ATN92805.1     | 97%  | 52.63% | 2.00E-32  |
| 104 | 63430 | 63642 | + | 70  | hypothetical protein | Pseudomonas<br>phage phiPsa300 | QNO00166.1     | 100% | 92.86% | 6.00E-42  |
| 105 | 63632 | 63754 | + | 40  | hypothetical protein | Pseudomonas<br>phage phiPsa374 | YP_009900274.1 | 100% | 97.50% | 2.00E-18  |
| 106 | 63751 | 63945 | + | 64  | hypothetical protein | Pseudomonas<br>phage phiPsa315 | QNO00351.1     | 98%  | 80.95% | 5.00E-28  |

---

---

|     |       |       |   |     |                      |                                |                |      |        |          |
|-----|-------|-------|---|-----|----------------------|--------------------------------|----------------|------|--------|----------|
| 107 | 63942 | 65795 | + | 617 | hypothetical protein | Pseudomonas<br>phage phiPsa315 | QNO00206.1     | 99%  | 98.70% | 0.00E+00 |
| 108 | 65856 | 68138 | + | 760 | hypothetical protein | Pseudomonas<br>phage phiPsa315 | QNO00205.1     | 100% | 97.50% | 0.00E+00 |
| 109 | 68208 | 68540 | + | 110 | hypothetical protein | Pseudomonas<br>phage VCM       | YP_009222626.1 | 99%  | 59.63% | 1.00E-32 |
| 110 | 68550 | 68741 | + | 63  | hypothetical protein | Pseudomonas<br>phage phiPsa300 | QNO00183.1     | 96%  | 79.37% | 1.00E-26 |
| 111 | 68757 | 69035 | + | 92  | hypothetical protein | Pseudomonas<br>phage phiPsa374 | YP_009009407.1 | 100% | 95.65% | 7.00E-54 |
| 112 | 69071 | 69217 | + | 48  | hypothetical protein | Pseudomonas<br>phage phiPsa374 | YP_009900277.1 | 100% | 77.08% | 1.00E-17 |

---

---

|     |       |       |   |     |                      |                                |                |      |        |           |
|-----|-------|-------|---|-----|----------------------|--------------------------------|----------------|------|--------|-----------|
| 113 | 69250 | 69678 | + | 142 | hypothetical protein | Pseudomonas<br>phage phiPsa374 | YP_009009409.1 | 100% | 80.99% | 5.00E-75  |
| 114 | 69761 | 70783 | + | 340 | hypothetical protein | Pseudomonas<br>phage phiPsa315 | QNO00223.1     | 100% | 96.19% | 0.00E+00  |
| 115 | 70858 | 71115 | + | 85  | hypothetical protein | Pseudomonas<br>phage phiPsa347 | QNO00486.1     | 100% | 96.47% | 1.00E-52  |
| 116 | 71112 | 71237 | + | 41  | hypothetical protein | Pseudomonas<br>phage phiPsa374 | YP_009009412.1 | 80%  | 77.27% | 0.014     |
| 117 | 71234 | 71812 | + | 192 | hypothetical protein | Pseudomonas<br>phage phiPsa374 | YP_009009413.1 | 100% | 92.19% | 1.00E-125 |

---

---

|     |       |       |   |     |                      |                                |            |      |         |           |
|-----|-------|-------|---|-----|----------------------|--------------------------------|------------|------|---------|-----------|
| 118 | 71809 | 72084 | + | 91  | hypothetical protein | Pseudomonas<br>phage phiPsa315 | QNO00310.1 | 100% | 100.00% | 3.00E-58  |
| 119 | 72131 | 73165 | + | 344 | hypothetical protein | Pseudomonas<br>phage phiPsa315 | QNO00222.1 | 100% | 99.13%  | 0.00E+00  |
| 120 | 73165 | 73365 | + | 66  | hypothetical protein | Pseudomonas<br>phage phiPsa267 | QNN99998.1 | 100% | 92.42%  | 2.00E-36  |
| 121 | 73362 | 73916 | + | 184 | hypothetical protein | Pseudomonas<br>phage phiPsa315 | QNO00249.1 | 100% | 100.00% | 7.00E-132 |
| 122 | 73913 | 74275 | + | 120 | hypothetical protein | Pseudomonas<br>phage phiPsa315 | QNO00287.1 | 100% | 99.17%  | 3.00E-84  |

---

---

|     |       |       |   |     |                      |                                |                |      |        |           |
|-----|-------|-------|---|-----|----------------------|--------------------------------|----------------|------|--------|-----------|
| 123 | 74268 | 75050 | + | 260 | hypothetical protein | Pseudomonas<br>phage phiPsa381 | QNO00577.1     | 100% | 97.69% | 0.00E+00  |
| 124 | 75102 | 75332 | + | 76  | hypothetical protein | Pseudomonas<br>phage phiPsa374 | YP_009009420.1 | 90%  | 90.77% | 3.00E-36  |
| 125 | 75320 | 75520 | + | 66  | hypothetical protein | Pseudomonas<br>phage phiPsa315 | QNO00345.1     | 100% | 96.97% | 2.00E-35  |
| 126 | 75517 | 76203 | + | 228 | hypothetical protein | Pseudomonas<br>phage phiPsa267 | QNN99889.1     | 98%  | 88.94% | 3.00E-129 |
| 127 | 76280 | 77221 | + | 313 | hypothetical protein | Pseudomonas<br>phage phiPsa315 | QNO00225.1     | 96%  | 88.85% | 0.00E+00  |

---



---

|     |       |       |   |     |                                                                                   |                                |                |      |         |          |
|-----|-------|-------|---|-----|-----------------------------------------------------------------------------------|--------------------------------|----------------|------|---------|----------|
| 128 | 77214 | 77552 | + | 112 | hypothetical protein                                                              | Pseudomonas<br>phage phiPsa315 | QNO00296.1     | 100% | 99.11%  | 4.00E-78 |
| 129 | 77561 | 78619 | + | 352 | hypothetical protein                                                              | Pseudomonas<br>phage phiPsa267 | QNN99873.1     | 99%  | 98.57%  | 0.00E+00 |
| 130 | 78612 | 80342 | + | 576 | Ribonucleotide reductase of class Ia<br>(aerobic), alpha subunit (EC<br>1.17.4.1) | Pseudomonas<br>phage phiPsa315 | QNO00209.1     | 100% | 99.13%  | 0.00E+00 |
| 131 | 80386 | 80742 | + | 118 | hypothetical protein                                                              | Pseudomonas<br>phage phiPsa374 | YP_009009428.1 | 100% | 100.00% | 7.00E-79 |
| 132 | 80787 | 81026 | + | 79  | hypothetical protein                                                              | Pseudomonas<br>phage phiPsa315 | QNO00323.1     | 98%  | 98.73%  | 1.00E-52 |

---

---

|     |       |       |   |     |                            |                                |                |      |        |          |
|-----|-------|-------|---|-----|----------------------------|--------------------------------|----------------|------|--------|----------|
| 133 | 81026 | 81184 | + | 52  | hypothetical protein       | Pseudomonas<br>phage phiPsa267 | QNO00018.1     | 100% | 96.15% | 6.00E-26 |
| 134 | 81184 | 81318 | + | 44  | hypothetical protein       | Pseudomonas<br>phage phiPsa374 | YP_009009431.1 | 97%  | 95.35% | 1.00E-18 |
| 135 | 81331 | 81693 | + | 120 | hypothetical protein       | Pseudomonas<br>phage phiPsa315 | QNO00288.1     | 100% | 88.33% | 2.00E-76 |
| 136 | 81690 | 81920 | + | 76  | hypothetical protein       | Pseudomonas<br>phage phiPsa315 | QNO00326.1     | 100% | 97.37% | 1.00E-46 |
| 137 | 81917 | 82111 | + | 64  | hypothetical protein       | Pseudomonas<br>phage PPSC2     | ATN92838.1     | 96%  | 65.62% | 2.00E-21 |
| 138 | 82136 | 82549 | + | 137 | Phage protein (ACLAME 992) | Pseudomonas<br>phage phiPsa300 | QNO00101.1     | 100% | 83.21% | 8.00E-79 |

---

---

|     |       |       |   |     |                      |                                |                |      |        |          |
|-----|-------|-------|---|-----|----------------------|--------------------------------|----------------|------|--------|----------|
| 139 | 82546 | 82986 | + | 146 | hypothetical protein | Pseudomonas<br>phage phiPsa300 | QNO00094.1     | 100% | 89.80% | 6.00E-93 |
| 140 | 82996 | 83256 | + | 86  | hypothetical protein | Pseudomonas<br>phage phiPsa374 | YP_009009440.1 | 100% | 82.56% | 2.00E-45 |
| 141 | 83275 | 83691 | + | 138 | hypothetical protein | Pseudomonas<br>phage phiPsa374 | YP_009009441.1 | 100% | 90.58% | 5.00E-87 |
| 142 | 83691 | 83951 | + | 86  | hypothetical protein | Pseudomonas<br>phage phiPsa374 | YP_009009442.1 | 100% | 79.07% | 4.00E-39 |
| 143 | 84028 | 84357 | + | 109 | hypothetical protein | Pseudomonas<br>phage phiPsa381 | QNO00643.1     | 100% | 64.22% | 1.00E-44 |

---

---

|     |       |       |   |     |                             |                                |            |      |        |          |
|-----|-------|-------|---|-----|-----------------------------|--------------------------------|------------|------|--------|----------|
| 144 | 84370 | 85329 | + | 319 | Phage protein (ACLAME 1471) | Pseudomonas<br>phage phiPsa381 | QNO00569.1 | 100% | 82.07% | 0.00E+00 |
| 145 | 85329 | 85586 | + | 85  | hypothetical protein        | Pseudomonas<br>phage phiPsa315 | QNO00319.1 | 100% | 92.94% | 1.00E-53 |
| 146 | 85586 | 85978 | + | 130 | hypothetical protein        | Pseudomonas<br>phage phiPsa315 | QNO00277.1 | 100% | 99.23% | 1.00E-90 |
| 147 | 85978 | 86073 | + | 31  | hypothetical protein        | None                           | n/a        | n/a  | n/a    | n/a      |
| 148 | 86070 | 86318 | + | 82  | hypothetical protein        | None                           | n/a        | n/a  | n/a    | n/a      |
| 149 | 86296 | 86556 | + | 86  | hypothetical protein        | Pseudomonas<br>phage phiPsa315 | QNO00317.1 | 100% | 69.77% | 3.00E-37 |

---

|     |       |       |   |     |                      |                                |                |      |        |          |
|-----|-------|-------|---|-----|----------------------|--------------------------------|----------------|------|--------|----------|
| 150 | 86553 | 86780 | + | 75  | hypothetical protein | Pseudomonas<br>phage phiPsa267 | QNN99982.1     | 100% | 77.33% | 4.00E-35 |
| 151 | 86777 | 86920 | + | 47  | hypothetical protein | Pseudomonas<br>phage phiPsa347 | QNO00543.1     | 100% | 97.87% | 4.00E-23 |
| 152 | 86995 | 87189 | + | 64  | hypothetical protein | Pseudomonas<br>phage phiPsa374 | YP_009009450.1 | 100% | 93.75% | 2.00E-34 |
| 153 | 87292 | 87573 | + | 93  | hypothetical protein | None                           | n/a            | n/a  | n/a    | n/a      |
| 154 | 87570 | 87908 | + | 112 | hypothetical protein | Pseudomonas<br>phage phiPsa315 | QNO00282.1     | 100% | 98.21% | 2.00E-76 |
| 155 | 87908 | 88096 | + | 62  | hypothetical protein | Pseudomonas<br>phage VCM       | YP_009222620.1 | 100% | 75.81% | 2.00E-23 |

---

|     |       |       |   |     |                      |                                |            |      |        |           |
|-----|-------|-------|---|-----|----------------------|--------------------------------|------------|------|--------|-----------|
| 156 | 88093 | 89256 | + | 387 | hypothetical protein | Pseudomonas<br>phage phiPsa315 | QNO00216.1 | 100% | 89.41% | 0.00E+00  |
| 157 | 89249 | 89431 | + | 60  | hypothetical protein | Pseudomonas<br>phage phiPsa347 | QNO00533.1 | 100% | 85.00% | 8.00E-31  |
| 158 | 89613 | 89837 | + | 74  | hypothetical protein | Pseudomonas<br>phage phiPsa315 | QNO00331.1 | 100% | 45.95% | 4.00E-18  |
| 159 | 90375 | 91499 | + | 374 | hypothetical protein | Pseudomonas<br>phage phiPsa315 | QNO00219.1 | 99%  | 87.87% | 0.00E+00  |
| 160 | 91576 | 92040 | + | 154 | hypothetical protein | Pseudomonas<br>phage phiPsa315 | QNO00256.1 | 100% | 92.86% | 4.00E-104 |

---

---

|     |       |       |   |     |                      |                                |                |      |         |          |
|-----|-------|-------|---|-----|----------------------|--------------------------------|----------------|------|---------|----------|
| 161 | 92222 | 92422 | + | 66  | hypothetical protein | Pseudomonas<br>phage phiPsa374 | YP_009009457.1 | 78%  | 88.46%  | 1.00E-19 |
| 162 | 92520 | 92819 | + | 99  | hypothetical protein | Pseudomonas<br>phage phiPsa315 | QNO00307.1     | 100% | 98.99%  | 6.00E-65 |
| 163 | 92968 | 93108 | + | 46  | hypothetical protein | Pseudomonas<br>phage phiPsa315 | QNO00368.1     | 100% | 93.48%  | 8.00E-22 |
| 164 | 93172 | 93306 | + | 44  | hypothetical protein | Pseudomonas<br>phage phiPsa315 | QNO00361.1     | 100% | 100.00% | 1.00E-23 |
| 165 | 93306 | 93686 | + | 126 | hypothetical protein | Pseudomonas<br>phage phiPsa374 | YP_009009461.1 | 100% | 88.89%  | 2.00E-77 |

---

---

|     |       |       |   |     |                      |                                |                |      |        |           |
|-----|-------|-------|---|-----|----------------------|--------------------------------|----------------|------|--------|-----------|
| 166 | 93753 | 94433 | + | 226 | hypothetical protein | Pseudomonas<br>phage phiPsa315 | QNO00237.1     | 100% | 86.28% | 7.00E-140 |
| 167 | 94488 | 94886 | + | 132 | hypothetical protein | Pseudomonas<br>phage phiPsa374 | YP_009009463.1 | 83%  | 80.91% | 2.00E-62  |
| 168 | 94948 | 95217 | + | 89  | hypothetical protein | Pseudomonas<br>phage phiPsa315 | QNO00311.1     | 100% | 97.75% | 3.00E-57  |
| 169 | 95244 | 95747 | + | 167 | hypothetical protein | Pseudomonas<br>phage phiPsa315 | QNO00254.1     | 100% | 97.01% | 1.00E-118 |
| 170 | 95923 | 96366 | + | 147 | hypothetical protein | Pseudomonas<br>phage phiPsa315 | QNO00264.1     | 100% | 94.63% | 8.00E-96  |

---



---

|     |       |       |   |     |                      |                                |            |      |        |          |
|-----|-------|-------|---|-----|----------------------|--------------------------------|------------|------|--------|----------|
| 171 | 96366 | 96539 | + | 57  | hypothetical protein | Pseudomonas<br>phage phiPsa315 | QNO00359.1 | 100% | 98.25% | 4.00E-33 |
| 172 | 96579 | 96734 | + | 51  | hypothetical protein | None                           | n/a        | n/a  | n/a    | n/a      |
| 173 | 96820 | 97203 | + | 127 | hypothetical protein | None                           | n/a        | n/a  | n/a    | n/a      |
| 174 | 97269 | 97502 | + | 77  | hypothetical protein | Pseudomonas<br>phage phiPsa315 | QNO00325.1 | 100% | 97.40% | 2.00E-49 |
| 175 | 97571 | 97789 | + | 72  | hypothetical protein | Pseudomonas<br>phage phiPsa315 | QNO00333.1 | 100% | 93.06% | 1.00E-41 |
| 176 | 97864 | 98055 | + | 63  | hypothetical protein | Pseudomonas<br>phage phiPsa315 | QNO00355.1 | 96%  | 64.52% | 2.00E-23 |

---

---

|     |       |       |   |    |                      |                                |            |      |        |          |
|-----|-------|-------|---|----|----------------------|--------------------------------|------------|------|--------|----------|
| 177 | 98057 | 98323 | + | 88 | hypothetical protein | Pseudomonas<br>phage phiPsa315 | QNO00313.1 | 100% | 96.59% | 4.00E-56 |
|-----|-------|-------|---|----|----------------------|--------------------------------|------------|------|--------|----------|

---
